# Supplementary material for: Engineered multifunctional metal–phenolic nanocoatings for label-free capture and “self-release” of heterogeneous circulating tumor cells
Source: Royal Society of Chemistry journal article supplement (doi:10.1039/d1nr04112f), 2021-01-01
Supplement: d1nr04112f1.pdf [file d1nr04112f1.pdf]

## Electronic Supplementary Information

### Engineered multifunctional metal-phenolic nanocoatings for label-free capture and “self-release” of heterogeneous circulating tumor cells

Yiling Liu,<sup>a</sup> Xiaoshan Wang,<sup>b</sup> Yuwei Zhou,<sup>a</sup> Guang Yang,<sup>c</sup> Jianwen Hou<sup>\*a</sup> and Shaobing Zhou<sup>\*a</sup>

<sup>a</sup> *Key Laboratory of Advanced Technologies of Materials, Ministry of Education, School of Materials Science and Engineering, Southwest Jiaotong University, Chengdu, 610031, PR China*

<sup>b</sup> *Cancer Center, Sichuan Academy of Medical Sciences & Sichuan Provincial People's Hospital, School of Medicine, University of Electronic Science and Technology of China, Chengdu, 610072, PR China*

<sup>c</sup> *College of Medicine, Southwest Jiaotong University, Chengdu 610031, China.*

Corresponding author: [hujianwen@swjtu.edu.cn](mailto:hujianwen@swjtu.edu.cn), [shaobingzhou@swjtu.edu.cn](mailto:shaobingzhou@swjtu.edu.cn)

#### Table of Contents

|                               |     |
|-------------------------------|-----|
| 1. Supplementary Figures..... | S2  |
| 2. Supplementary Tables.....  | S10 |

## 1. Supplementary Figures:

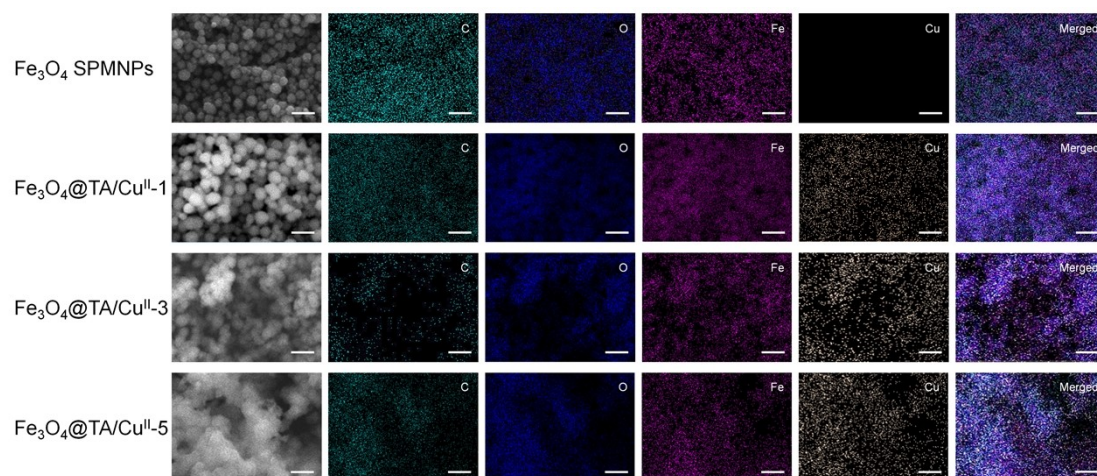

**Figure S1.** EDS elemental mapping of different nanoparticles. The scale bar is 1  $\mu\text{m}$ .

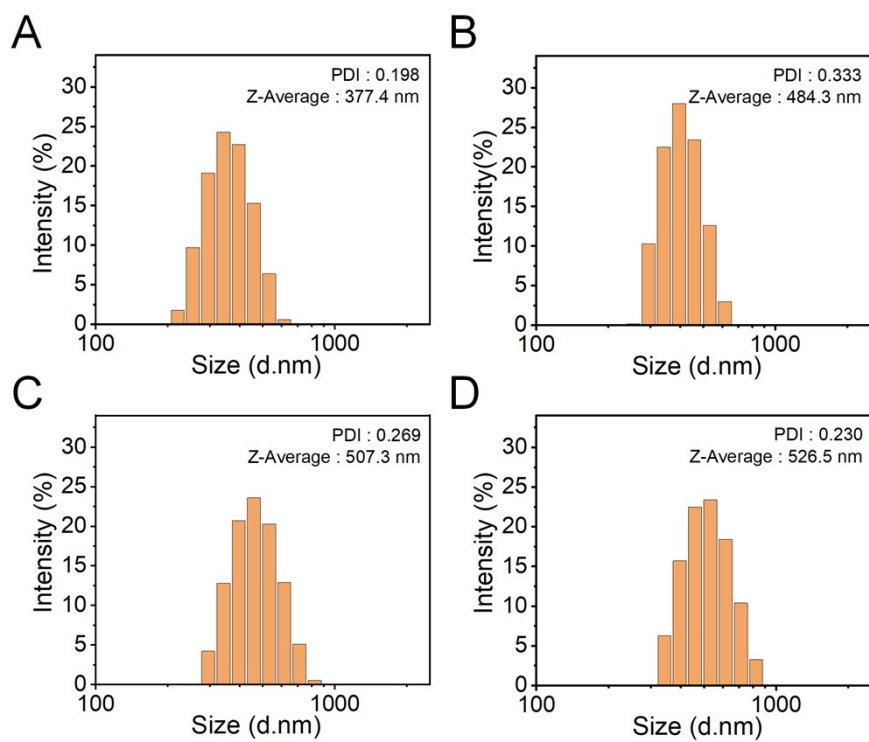

**Figure S2.** Hydrodynamic size of (A)  $\text{Fe}_3\text{O}_4$ , (B)  $\text{Fe}_3\text{O}_4@\text{TA}/\text{Cu}^{\text{II}}\text{-1}$ , (C)  $\text{Fe}_3\text{O}_4@\text{TA}/\text{Cu}^{\text{II}}\text{-3}$  and (D)  $\text{Fe}_3\text{O}_4@\text{TA}/\text{Cu}^{\text{II}}\text{-5}$  SPMNPs.

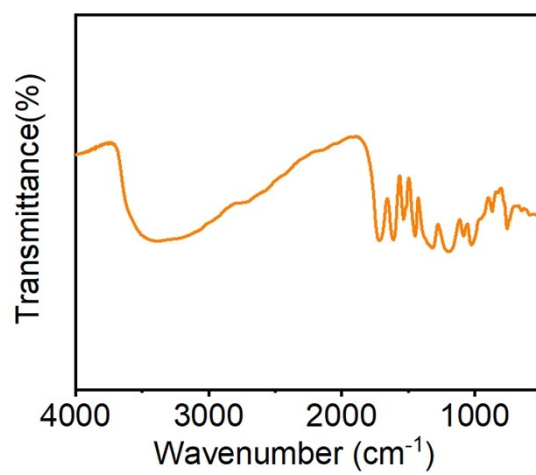

**Figure S3.** FTIR spectrum of TA.

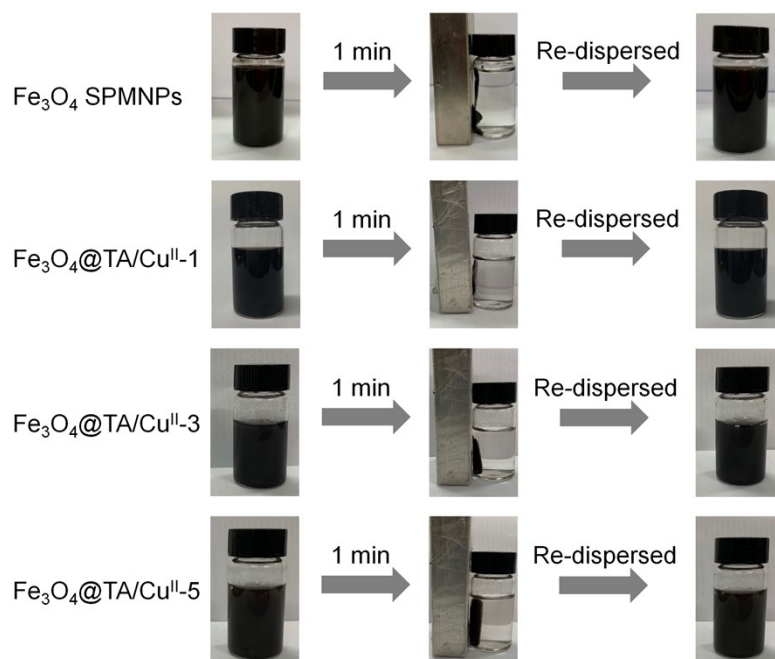

**Figure S4.** Typical photographs showing the magnetic response and dispersion performance of different nanoparticles.

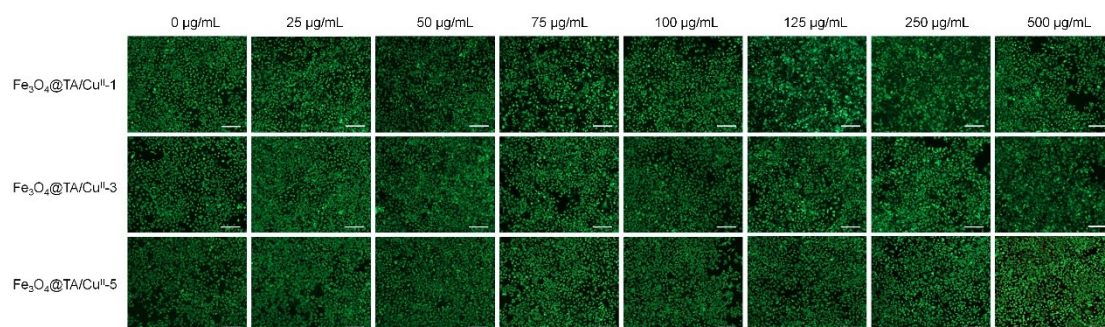

**Figure S5.** Fluorescence images showing the viability of MCF-7 cells following treatment with different concentrations of  $\text{Fe}_3\text{O}_4@\text{TA}/\text{Cu}^{\text{II}}$  SPMNPs for 24 h. Green calcein AM fluorescence and red PI fluorescence indicating live and dead cells, respectively. The scale bar is 200  $\mu\text{m}$ .

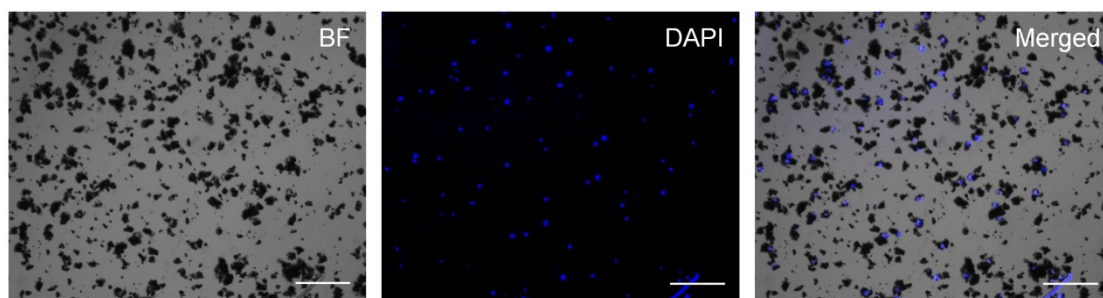

**Figure S6.** Bright field (BF), fluorescent and merged image of MCF-7 cells captured by  $\text{Fe}_3\text{O}_4@\text{TA}/\text{Cu}^{\text{II}}\text{-3}$  SPMNPs. The scale bar is 200  $\mu\text{m}$ .

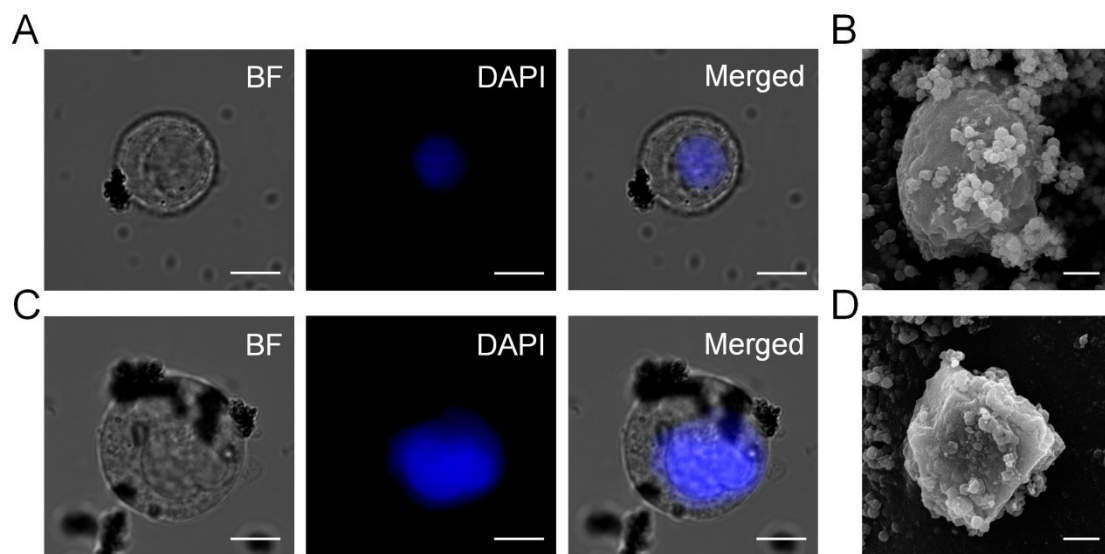

**Figure S7.** Bright field, fluorescent and merged images of single MCF-7 cell captured by (A) Fe<sub>3</sub>O<sub>4</sub>@TA/Cu<sup>II</sup>-1 and (C) Fe<sub>3</sub>O<sub>4</sub>@TA/Cu<sup>II</sup>-5 SPMNPs stained with DAPI. The scale bar is 10 μm. SEM image showing single MCF-7 cell captured by (B) Fe<sub>3</sub>O<sub>4</sub>@TA/Cu<sup>II</sup>-1 and (D) Fe<sub>3</sub>O<sub>4</sub>@TA/Cu<sup>II</sup>-5 SPMNPs. The scale bar is 2 μm.



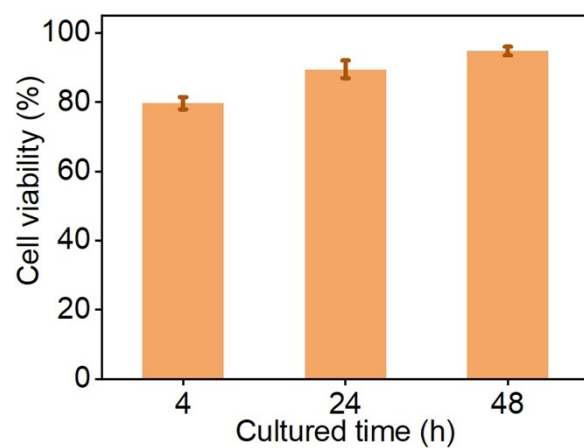

**Figure S8.** Cell viability of released cells after different culture time. All bars represent means  $\pm$  SD (n=3).

## 2. Supplementary Tables:

**Table S1.** Basic information of cancer patients.

| Sample<br>No. | Cancer<br>Type | Gender | Age | Volume<br>processed/mL | CTCs |
|---------------|----------------|--------|-----|------------------------|------|
| 1             | breast         | female | 49  | 1                      | 1    |
| 2             | breast         | female | 53  | 1                      | 13   |
| 3             | peritoneal     | female | 48  | 1                      | 6    |
| 4             | peritoneal     | male   | 5   | 1                      | 2    |
| 5             | colorectal     | female | 57  | 1                      | 1    |
| 6             | gastric        | male   | 64  | 1                      | 3    |
| 7             | lung           | male   | 70  | 1                      | 2    |
| 8             | lung           | male   | 33  | 1                      | 1    |
| 9             | lung           | male   | 57  | 1                      | 5    |
| 10            | lung           | female | 56  | 1                      | 6    |
| 11            | lung           | male   | 54  | 1                      | 4    |
| 12            | lung           | male   | 62  | 1                      | 3    |
| 13            | lung           | male   | 67  | 1                      | 1    |
| 14            | renal          | male   | 57  | 1                      | 9    |

**Table S2.** Basic information of healthy donors.

| Sample<br>No. | Gender | Age | Volume<br>processed/mL | CTCs |
|---------------|--------|-----|------------------------|------|
| 1             | female | 25  | 1                      | 0    |
| 2             | male   | 33  | 1                      | 0    |
| 3             | female | 26  | 1                      | 0    |
